# Supplementary material for: A diploid assembly-based benchmark for variants in the major histocompatibility complex
Source: PubMed Central journal article supplement (PMC7508831; doi:10.1038/s41467-020-18564-9), 2020-09-22
Supplement: 41467_2020_18564_MOESM1_ESM.pdf [file 41467_2020_18564_MOESM1_ESM.pdf]

## Supplementary Information for “A Diploid Assembly-based Benchmark for Variants in the Major Histocompatibility Complex” by Chin et al.

### Supplementary Note 1: All three technologies were needed to form a single phase block for the MHC

To determine what technologies were necessary to obtain a single phasing block without using trio information, we used WhatsHap 0.18 with various combinations of technologies and calculated the number of phasing blocks:

- PacBio alone: Number of phased blocks: 30, Largest component contains 3095 variants (24.9% of accessible variants) between position 32553266 and 32910482
- PacBio + 10x: Number of phased blocks: 4, Largest component contains 6954 variants (55.9% of accessible variants) between position 28498559 and 31874134
- ONT ultralong alone: Number of phased blocks: 3, Largest component contains 7969 variants (64.1% of accessible variants) between position 28498559 and 32460863
- PacBio + ONT ultralong: Number of phased blocks: 3, Largest component contains 7969 variants (64.1% of accessible variants) between position 28498559 and 32460863 (Note: this results is the same as those of using ONT ultra long alone. We think PacBio reads do not contain extra phasing information on top of the ONT ultra long reads..)
- PacBio + ONT ultralong + 10x: Number of phased blocks: 1, Largest component contains 12441 variants (100.0% of accessible variants) between position 28498559 and 33448264

With our current methods and data types, we need all three data types to achieve a single phasing block across the MHC region.

### Supplementary Note 2: Structural Variants (SVs)

Although they are excluded from the benchmark bed, the dipcall vcf also includes 63 deletions and 63 insertions  $\geq 50$  bp in size. Upon curation of 20 randomly selected SVs, they all appeared to be accurate except for one assembler error in hap1, where the vcf has a false 55 bp deletion at 6:31690555 (near another false 27 bp insertion, both of which are excluded by the benchmark bed). However, 68 out of 126 are within 1000 bp of another SV, and 60 have at least 50 % overlap with a tandem repeat or homopolymer. Clustered SVs like these, particularly in tandem repeats, can typically be represented in many different ways, and unlike small variants, no benchmarking tools currently exist that correctly

compare different representations of clusters of SVs. Therefore, we keep these in the vcf, but future work will be needed to develop tools to use these SVs to evaluate performance in an automated way. One complex example is an inversion and insertion in Supplementary Figure 1A, which is represented by dipcall as a deletion at 6:31009222 and a compound heterozygous insertion at 6:31010095. The haplotype 1 assembly is structurally similar and ~99.6 % identical to an ALT locus in GRCh38 (Supplementary Figure 1B).

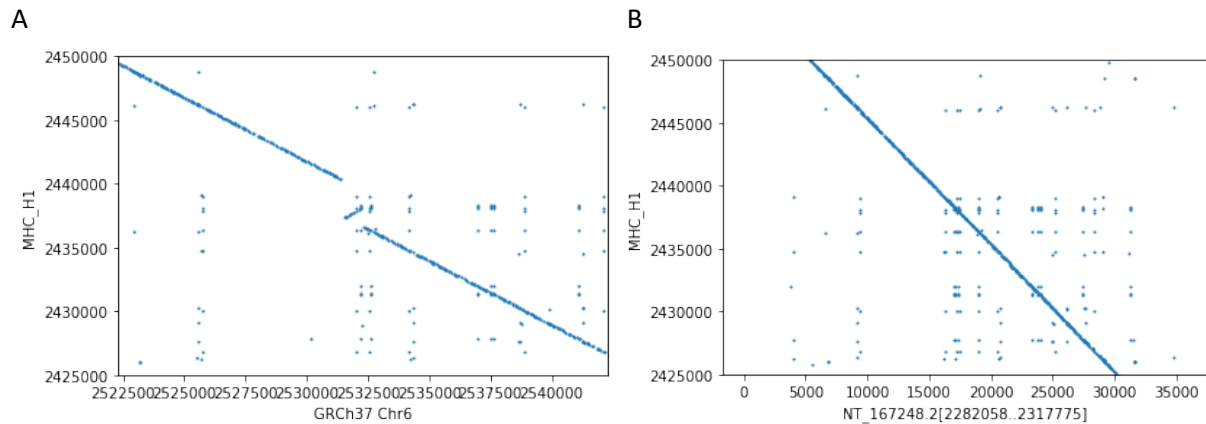

Supplementary Figure 1: A dotplot of the haplotype 1 assembly vs. GRCh37 showing a complex structural variant in HG002, represented as a deletion at 6:31009222 and a compound heterozygous insertion at 6:31010095 in the VCF. The haplotype 1 assembly in this region is structurally more similar to one of the ALT sequence (Genbank accession: NT\_167248.2, GRCh38.p12 alternate locus group ALT\_REF\_LOCI\_6 HSCHR6\_MHC\_QBL\_CTG1) in GRCh38. However, the sequence identity between haplotype 1 assembly and the ALT contig is only 99.6%.

## Supplementary Note 3: Jupyter Notebooks

We describe the Jupyter notebooks available at [https://github.com/NCBI-Hackathons/TheHumanPangenome/tree/master/MHC/e2e\\_notebooks](https://github.com/NCBI-Hackathons/TheHumanPangenome/tree/master/MHC/e2e_notebooks)

00\_fetchreads.ipynb: This notebook shows how we fetch reads that may belong to the MHC region of the HG002 Genomes

We use the command `shmr-map` in the Peregrine Assembler Suite to compare the HiFi reads for phasing and assembling the HG002 MHC region. The 'shmr-map' tools using SHIMMER (<https://www.biorxiv.org/content/10.1101/705616v1>) to map the reads to the GHRh37 MHC and the (unphased) genome assembly of HG002 MHC region from an assembly (`s3://human-pangenomics/HPRC/HG002_Assessment/assemblies/JC_20k_15k_asm/asm.fa.gz`, contig 000028F:1700756-6708745). The two MHC sequences are used for recruiting the reads.

## 01\_get\_phased\_reads.ipynb : Generating Phased Read Sets

This notebook shows the process of performing the haplotype phasing with 10x, Oxford Nanopore Reads and PacBio HiFi reads. We also perform a couple different experiments of different combinations of the data sets for phasing.

## 02\_run\_assembler.ipynb: A Notebook for running the Peregrine assembler

This notebook is used in the development for the benchmark assembly. A public docker image [registry.hub.docker.com/cschin/peregrine:mhc\\_hg002\\_20200325](https://registry.hub.docker.com/cschin/peregrine:mhc_hg002_20200325) contains the running environment, data, and the script to reproduce the benchmark assembly.

This notebook only contains the initial assembly part. The assembly contig generated by this notebook does not resolve the repeats around the C4A region. Please see the docker image for the script and code to reproduce our results resolving the repeats.

## 03\_get\_variant\_cluster: Get variants called from the reads mapped back to the assembled contigs

The assembled contigs should be consistent with the reads that used to generate them. We mapped the reads back to the contigs and checked if there were clusters of variants which indicate potential issues of the assembled contigs.

Reproduce the Phased and repeat resolved assembly with a docker ([https://en.wikipedia.org/wiki/Docker\\_%28software%29](https://en.wikipedia.org/wiki/Docker_%28software%29)) image

Running the docker image in a container and get an interactive shell:

```
docker run -it registry.hub.docker.com/cschin/peregrine:mhc_hg002_20200325
```

Existing assembly results can be found at:

```
/wd/asm-HG002-MHC-H1
```

and

```
/wd/asm-HG002-MHC-H2
```

To regenerate the assemblies in the container:

```
cd /wd && bash generate_assembly.sh
cd /wd/asm-HG002-MHC-H1/ && cp ../template/run.sh . && . /root/.bashrc &&
bash run.sh
cd /wd/asm-HG002-MHC-H2/ && cp ../template/run.sh . && . /root/.bashrc &&
bash run.sh
```

## Using Dipcall to call variants in MHC assembly

The following workflow details using Dipcall (commit 7746f3364dab7e9088b059c613fbccc3ff0fc945) to call variants in MHC assembly. We modify the <https://github.com/lh3/dipcall/blob/master/run-dipcall#L40> by adding `-z200000,10000` to increase the mappability of Minimap2 around the MHC region. The same results can also be achieved by changing `-z` to `20000,10000`.

```
wget -O GCA_000001405.15_GRCh38_no_alt_analysis_set.fa.gz
ftp://ftp.ncbi.nlm.nih.gov/genomes/all/GCA/000/001/405/GCA_000001405.15_GRCh38/seqs_for_alignment_pipelines.ucsc_ids/GCA_000001405.15_GRCh38_no_alt_analysis_set.fna.gz
```

```
gunzip GCA_000001405.15_GRCh38_no_alt_analysis_set.fa.gz dipcall.kit/samtools faidx
GCA_000001405.15_GRCh38_no_alt_analysis_set.fa /home/dnanexus/dipcall.kit/run-dipcall
grch38_hg002 /home/dnanexus/GCA_000001405.15_GRCh38_no_alt_analysis_set.fa
```

```
/home/dnanexus/hap1_fasta.gz /home/dnanexus/hap2_fasta.gz -x
```

```
/home/dnanexus/dipcall.kit/hs38.PAR.bed make -j2 -f grch38_hg002.mak
```

**#The command `make -j2 -f hg002_denovo_grch38.mak` performs a series of operations under the hood.**

```
/home/dnanexus/dipcall.kit/minimap2 -c --paf-no-hit -xasm5 -z200000,10000 --cs -r2k -t8
/home/dnanexus/GCA_000001405.15_GRCh38_no_alt_analysis_set.fa
/home/dnanexus/hap1_fasta.gz 2> grch38_hg002.hap1.paf.gz.log | gzip >
grch38_hg002.hap1.paf.gz
```

```
/home/dnanexus/dipcall.kit/minimap2 -c --paf-no-hit -xasm5 -z200000,10000 --cs -r2k -t8
/home/dnanexus/GCA_000001405.15_GRCh38_no_alt_analysis_set.fa
/home/dnanexus/hap2_fasta.gz 2> grch38_hg002.hap2.paf.gz.log | gzip >
grch38_hg002.hap2.paf.gz
```

```
/home/dnanexus/dipcall.kit/minimap2 -a -xasm5 -z200000,10000 --cs -r2k -t8
/home/dnanexus/GCA_000001405.15_GRCh38_no_alt_analysis_set.fa
/home/dnanexus/hap1_fasta.gz 2> grch38_hg002.hap1.sam.gz.log | gzip >
grch38_hg002.hap1.sam.gz
```

```
/home/dnanexus/dipcall.kit/minimap2 -a -xasm5 -z200000,10000 --cs -r2k -t8
/home/dnanexus/GCA_000001405.15_GRCh38_no_alt_analysis_set.fa
/home/dnanexus/hap2_fasta.gz 2> grch38_hg002.hap2.sam.gz.log | gzip >
grch38_hg002.hap2.sam.gz
```

```
gzip -dc grch38_hg002.hap1.paf.gz | sort -k6,6 -k8,8n | /home/dnanexus/dipcall.kit/k8  
/home/dnanexus/dipcall.kit/paftools.js call - 2> grch38_hg002.hap1.var.gz.vst | gzip >  
grch38_hg002.hap1.var.gz
```

```
gzip -dc grch38_hg002.hap2.paf.gz | sort -k6,6 -k8,8n | /home/dnanexus/dipcall.kit/k8  
/home/dnanexus/dipcall.kit/paftools.js call - 2> grch38_hg002.hap2.var.gz.vst | gzip >  
grch38_hg002.hap2.var.gz
```

```
/home/dnanexus/dipcall.kit/k8 /home/dnanexus/dipcall.kit/dipcall-aux.js samflt  
grch38_hg002.hap1.sam.gz | /home/dnanexus/dipcall.kit/samtools sort -m4G --threads 4 -  
o grch38_hg002.hap1.bam -
```

```
gzip -dc grch38_hg002.hap1.var.gz | grep ^R | cut -f2- > grch38_hg002.hap1.bed
```

```
gzip -dc grch38_hg002.hap2.var.gz | grep ^R | cut -f2- > grch38_hg002.hap2.bed
```

```
/home/dnanexus/dipcall.kit/bedtk isec -m grch38_hg002.hap1.bed grch38_hg002.hap2.bed >  
grch38_hg002.dip.bed
```

```
/home/dnanexus/dipcall.kit/k8 /home/dnanexus/dipcall.kit/dipcall-aux.js samflt  
grch38_hg002.hap2.sam.gz | /home/dnanexus/dipcall.kit/samtools sort -m4G --threads 4 -  
o grch38_hg002.hap2.bam - /home/dnanexus/dipcall.kit/htsbox pileup -q5 -evcf  
/home/dnanexus/GCA_000001405.15_GRCh38_no_alt_analysis_set.fa grch38_hg002.hap1.bam  
grch38_hg002.hap2.bam | /home/dnanexus/dipcall.kit/htsbox bgzip >  
grch38_hg002.pair.vcf.gz
```

```
/home/dnanexus/dipcall.kit/k8 /home/dnanexus/dipcall.kit/dipcall-aux.js vcfpair  
grch38_hg002.pair.vcf.gz | /home/dnanexus/dipcall.kit/htsbox bgzip >  
grch38_hg002.dip.vcf.gz
```

**#For hg19 the command is similar except the reference file were taken from**

```
wget -O hs37d5.fa.gz  
ftp://ftp.1000genomes.ebi.ac.uk/vol1/ftp/technical/reference/phase2_reference_assembly  
_sequence/hs37d5.fa.gz
```

**and the PAR file is different dipcall.kit/hs37d5.PAR.bed**

## HLA\*ASM commands

```
perl HLA-ASM.pl --assembly_fasta $assembly.fa --sampleID $sample --  
truthFile truth.txt --use_minimap2 1
```

## Commands to generate benchmark regions

<https://github.com/NCBI->

[Hackathons/TheHumanPangenome/blob/master/MHC/benchmark\\_variant\\_callset/README\\_MHC\\_smallvar\\_benchmark.txt](https://github.com/NCBI-Hackathons/TheHumanPangenome/blob/master/MHC/benchmark_variant_callset/README_MHC_smallvar_benchmark.txt)

|                   | <b>scaffold size</b> | <b>total non-N bases</b> | <b>contig N50</b> | <b>number of gaps</b> | <b>average gap size</b> |
|-------------------|----------------------|--------------------------|-------------------|-----------------------|-------------------------|
| GRCh37/38 primary | 4,970,557            | 4,970,557                | 4,970,557         | 0                     | 0                       |
| GL000250          | 4,672,374            | 2,370,831                | 109,423           | 28                    | 82,198                  |
| GL000251          | 4,795,265            | 4,795,265                | 4,795,265         | 0                     | 0                       |
| GL000252          | 4,604,811            | 4,198,717                | 486,444           | 10                    | 40,609                  |
| GL000253          | 4,677,643            | 4,095,121                | 337,351           | 16                    | 36,408                  |
| GL000254          | 4,827,813            | 3,789,326                | 239,145           | 22                    | 47,204                  |
| GL000255          | 4,606,388            | 4,289,729                | 623,992           | 5                     | 63,332                  |
| GL000256          | 4,929,269            | 4,174,253                | 786,475           | 17                    | 44,413                  |
| H1                | 4,944,282            | 4,944,282                | 4,944,282         | 0                     | 0                       |
| H2                | 5,036,872            | 5,036,872                | 5,036,872         | 0                     | 0                       |

Supplementary Table 1: Characteristics of contigs in GRCh38 primary and alternate contigs relative to our haplotigs. The primary sequence of the MHC regions is identical in GRCh37 and GRCh38 (except at chr6:28719765 in GRCh38), but GRCh38 has additional ALT loci describing highly divergent sequences, which are in this table.

| <b>Contig Coordinates</b> | <b>GRCh37 Coordinates</b> |
|---------------------------|---------------------------|
| H1:975575-986243          | chr6:32460324-32460749    |
| H1:975575-986243          | chr6:32460988-32466089    |
| H1:975575-986243          | chr6:32467965-32468122    |
| H1:975575-986243          | chr6:32511540-32513868    |
| H2:1073334-1087791        | chr6:32108023-32108107    |
| H2:1073334-1087791        | chr6:32455269-32458397    |
| H2:1073334-1087791        | chr6:32460324-32460749    |
| H2:1073334-1087791        | chr6:32460988-32466089    |
| H2:1073334-1087791        | chr6:32467965-32468122    |
| H2:1073334-1087791        | chr6:32468484-32470163    |
| H2:1073334-1087791        | chr6:32472608-32473374    |
| H2:1073334-1087791        | chr6:32503470-32503816    |

Supplementary Table 2: List of low confidence regions in the assembled contigs. After expanding the regions by 10 % of their size and merging, we exclude 6:32452957-32475450 and 6:32501436-32516100 from the GRCh37 benchmark regions.



| Parameters       | Number of detected variants |
|------------------|-----------------------------|
| -z 200000,10000  | 26850                       |
| -z 200000,1000   | 26845                       |
| -z 200000,200    | 26845                       |
| -z 20000,10000   | 26850                       |
| -z 20000,200     | 26845                       |
| -z 2000,1000     | 26418                       |
| -z 4000,200      | 26796                       |
| -z 2000,200      | 26796                       |
| -z 800,300       | 23168                       |
| -z 400,200       | 20450                       |
| default (-z 200) | 18414                       |

Supplementary Table 3: The number of variants from different minimap2 parameters.

| Haplotig | Gene            | Utilized Ref Contig | start   | stop    | HG002 Alleles from Clinical HLA Typing | Edit Distance Between Called Genotype vs. Assembly | Closest HLA Type match to haplotig | Haplotype |
|----------|-----------------|---------------------|---------|---------|----------------------------------------|----------------------------------------------------|------------------------------------|-----------|
| H1       | <i>HLA-A</i>    | pgf                 | 1436987 | 1440489 | A*01:01:01G                            | 0                                                  | A*01:01:01G                        | Maternal  |
| H1       | <i>HLA-B</i>    | pgf                 | 2848251 | 2851577 | B*35:08:01G                            | 0                                                  | B*35:08:01G                        | Maternal  |
| H1       | <i>HLA-C</i>    | pgf                 | 2763854 | 2767202 | C*04:01:01G                            | 0                                                  | C*04:01:01G                        | Maternal  |
| H1       | <i>HLA-DQA1</i> | pgf                 | 4086777 | 4093261 | DQA1*01:01:01G                         | 0                                                  | DQA1*01:01:01G                     | Maternal  |
| H1       | <i>HLA-DQB1</i> | pgf                 | 4110116 | 4117205 | DQB1*05:01:01G                         | 0                                                  | DQB1*05:01:01G                     | Maternal  |
| H1       | <i>HLA-DRB1</i> | pgf                 | 4029789 | 4043078 | DRB1*10:01:01G                         | 0                                                  | DRB1*10:01:01G                     | Maternal  |
| H2       | <i>HLA-A</i>    | pgf                 | 1437427 | 1440943 | A*26:01:01G                            | 0                                                  | A*26:01:01G                        | Paternal  |
| H2       | <i>HLA-B</i>    | pgf                 | 2843682 | 2846993 | B*38:01:01G                            | 0                                                  | B*38:01:01G                        | Paternal  |
| H2       | <i>HLA-C</i>    | pgf                 | 2768829 | 2772177 | C*12:03:01G                            | 0                                                  | C*12:03:01G                        | Paternal  |
| H2       | <i>HLA-DQA1</i> | pgf                 | 4182456 | 4188892 | DQA1*03:01:01G                         | 0                                                  | DQA1*03:01:01G                     | Paternal  |
| H2       | <i>HLA-DQB1</i> | pgf                 | 4201076 | 4208201 | DQB1*03:02:01G                         | 0                                                  | DQB1*03:02:01G                     | Paternal  |
| H2       | <i>HLA-DRB1</i> | cox                 | 4122938 | 4138189 | DRB1*04:02:01                          | 0                                                  | DRB1*04:02:01                      | Paternal  |

Supplementary Table 4: Comparison of assembly-based HLA types to trio-phased HLA types from a clinical laboratory. The HLA Type are generated by HLA\*ASM
