# Supplementary material for: A diploid assembly-based benchmark for variants in the major histocompatibility complex
Source: PubMed Central journal article supplement (PMC7508831; doi:10.1038/s41467-020-18564-9), 2020-09-22
Supplement: 41467_2020_18564_MOESM3_ESM.pdf [file 41467_2020_18564_MOESM3_ESM.pdf]

## Description of Additional Supplementary Files

### **Supplementary Data 1**

**Description:** Detailed results of manual curation of false positives and false negatives from evaluation
